# Supplementary material for: Targeted Versus Nontargeted Communication About Electronic Nicotine Delivery Systems in Three Smoker Groups
Source: MDPI journal article supplement (doi:10.3390/ijerph15102071), 2018-09-21
Supplement: s1 [file s1]

**QUESTIONS USED TO IDENTIFY THE THREE SMOKER GROUPS:**

1. What is your current age? \_\_\_\_\_ years old

2. What is the highest level of education you have completed?

|                                              |                          |
|----------------------------------------------|--------------------------|
| Some high school                             | <input type="checkbox"/> |
| High school graduate or GED                  | <input type="checkbox"/> |
| Some college, vocational or technical school | <input type="checkbox"/> |
| College graduate or more                     | <input type="checkbox"/> |

3. What is your total annual household income?

|                      |                          |
|----------------------|--------------------------|
| Less than \$25,000   | <input type="checkbox"/> |
| \$25,000 to \$44,999 | <input type="checkbox"/> |
| \$50,000 to \$74,999 | <input type="checkbox"/> |
| \$75,000 or more     | <input type="checkbox"/> |

4. Please indicate which statements you agree with.

|                                                                              |                                                             |
|------------------------------------------------------------------------------|-------------------------------------------------------------|
| The government interferes far too much in our everyday lives.                | <input type="checkbox"/> Yes<br><input type="checkbox"/> No |
| It's not the government's business to try to protect people from themselves. | <input type="checkbox"/> Yes<br><input type="checkbox"/> No |

5. Do you currently smoke traditional cigarettes every day, somedays, or not at all?

|            |                          |
|------------|--------------------------|
| Everyday   | <input type="checkbox"/> |
| Somedays   | <input type="checkbox"/> |
| Not at all | <input type="checkbox"/> |

6. Have you ever used electronic vapor products, even one or two times?

|           |     |
|-----------|-----|
| No.....   | [ ] |
| Yes ..... | [ ] |

7. How often do you currently use electronic vapor products?

|                                       |     |
|---------------------------------------|-----|
| A few times per year                  | [ ] |
| Once a month                          | [ ] |
| Once a week                           | [ ] |
| At least three times per week or more | [ ] |

8. How much do you want to quit smoking? Would you say you want to quit...

|            |     |
|------------|-----|
| Not at all | [ ] |
| A little   | [ ] |
| Somewhat   | [ ] |
| A lot      | [ ] |
